# Supplementary material for: Ibrutinib is not an effective drug in primografts of TCF3-PBX1
Source: PubMed Central journal article supplement — Transl Oncol. 2020 Jun 18;13(10):100817. doi: 10.1016/j.tranon.2020.100817 (PMC7306596; doi:10.1016/j.tranon.2020.100817), 2020-06-18

## Supplemental figure legends

**Supplemental table 1: Characteristics of primary BCP-ALL cells.** Name, genetic subtype and additional remarks of all primary BCP-ALL samples used in this study.

**Supplemental figure 1: *In vivo* ibrutinib efficacy in xenografts RCH-ACV mCherry-Luc cell lines. (A)**

Bioluminescence imaging of mice engrafted with RCH-ACV mCherry-Luc for Days 7 till 21, treated with placebo (left column) or ibrutinib (right column) **(B)** Viability of host mCD45 positive cells in bone marrow (BM,  $p=0.99$ ), peripheral blood (PB,  $p=0.63$ ) and spleen (S,  $p=0.63$ ) for placebo (black circles,  $n=3$ ) and ibrutinib (grey squares,  $n=4$ )

**Supplemental figure 2: *In vivo* ibrutinib efficacy in xenografts of primary BCP-ALL samples. (A)**

Percentage of viable hCD19<sup>+</sup> cells in the harvested organs of mice engrafted with TCF3-PBX1 positive cells. Cells were negative for AnnexinV-FITC (AnV-) and propidium iodine (PI-) for placebo treated mice (black circles,  $n=6$ ) and ibrutinib treated mice (grey squares,  $n=7$ ) for bone marrow (BM,  $p=0.29$ ), peripheral blood (PB,  $p=0.53$ ) and spleen (S,  $p=0.06$ ). **(B)** Idem for mice engrafted with TCF3-PBX1 negative cells for placebo (black circles,  $n=6$ ) and ibrutinib (grey squares,  $n=5$ ) for BM ( $p=0.93$ ), PB ( $p=0.79$ ) and S ( $p=0.93$ ) **(C)** Viability of host mCD45 positive cells in bone marrow (BM,  $p=0.98$ ), peripheral blood (PB,  $p=0.40$ ) and spleen (S,  $p=0.62$ ) for placebo (black circles,  $n=12$ ) and ibrutinib (grey squares,  $n=12$ )

| Name        | Subtype        | Remarks   | Age at diagnosis<br>(in yrs) | WBC<br>(in 10 <sup>6</sup> /mL) | IKZF1<br>mutations |
|-------------|----------------|-----------|------------------------------|---------------------------------|--------------------|
| BCP-ALL #1  | TCF3-PBX1      | -         | 14                           | 4.1                             | WT                 |
| BCP-ALL #2  | TCF3-PBX1      | -         | 11                           | 34                              | WT                 |
| BCP-ALL #3  | TCF3-PBX1      | -         | 15                           | 14.6                            | nd                 |
| BCP-ALL #4  | TCF3-PBX1      | -         | 5                            | 17.7                            | WT                 |
| BCP-ALL #5  | BCR-ABL1-like* | Dic(9;20) | 2                            | 18                              | DEL EX4-7          |
| BCP-ALL #6  | BCR-ABL1       | -         | 1                            | 75                              | WT                 |
| BCP-ALL #7  | TCF3-PBX1      | -         | 1                            | 50                              | WT                 |
| BCP-ALL #8  | TCF3-PBX1      | -         | 13                           | 25.6                            | nd                 |
| BCP-ALL #9  | B-Other**      | -         | 15                           | 19.9                            | nd                 |
| BCP-ALL #10 | BCR-ABL1-like* | -         | 14                           | 75                              | DEL EX4-7          |
| BCP-ALL #11 | BCR-ABL1-like* | -         | 2                            | 97.4                            | DEL EX4-7          |

WBC: white blood cell count at diagnosis

\*Identification by profile of Den Boer et al., Lancet Oncol. 2009 Feb;10(2):125-34.

\*\*B-other case was negative for all known cytogenetic lesions used in the stratification of childhood ALL and did not express the BCR-ABL1-like gene expression profile.

# Supplemental figure 1

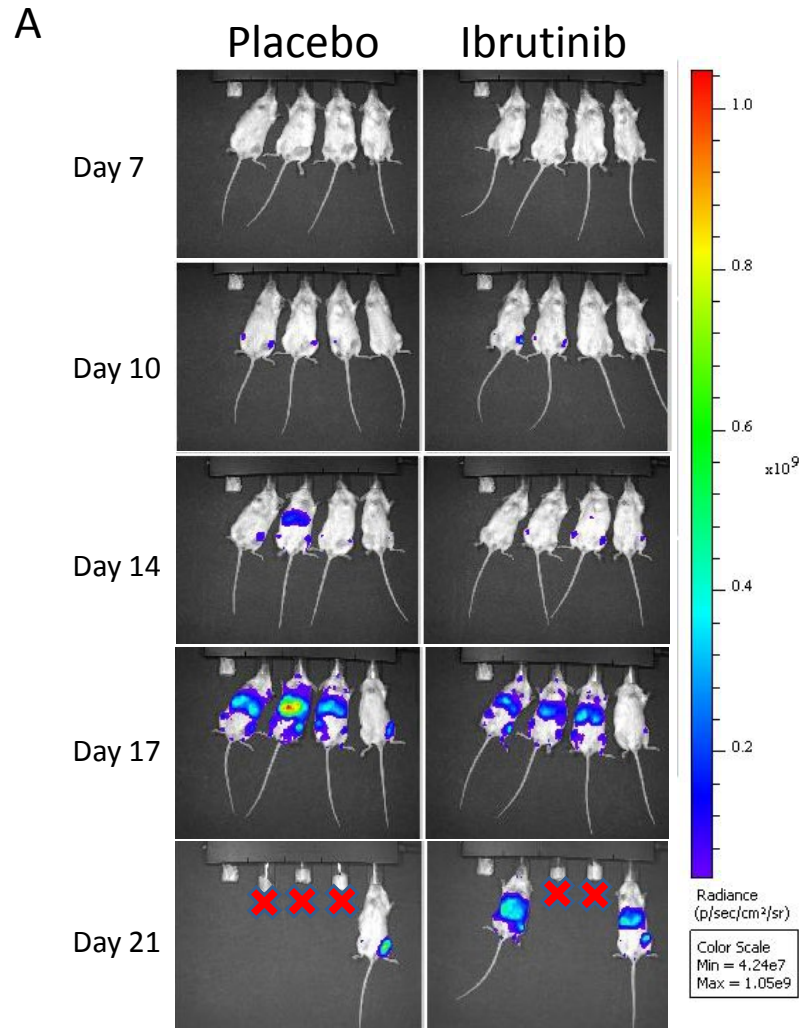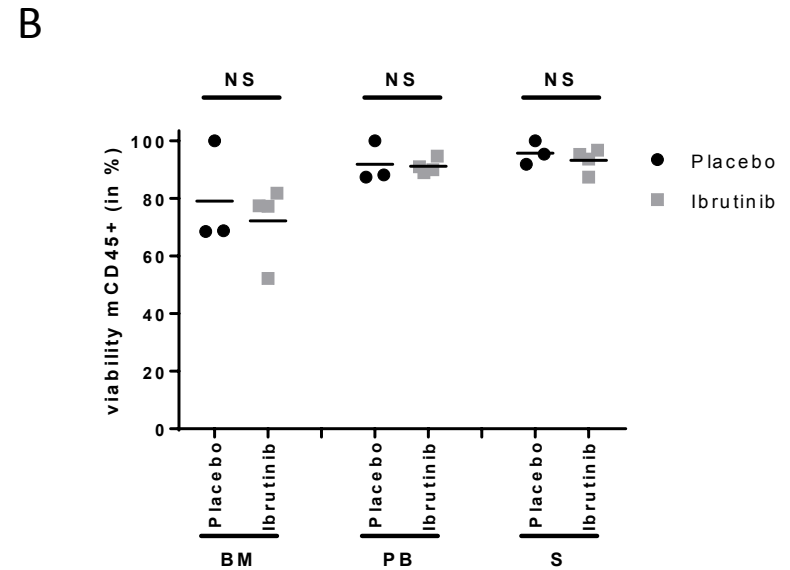

# Supplemental figure 2

## A

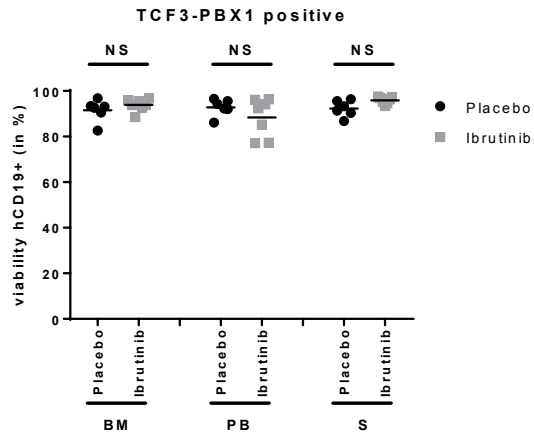

## B

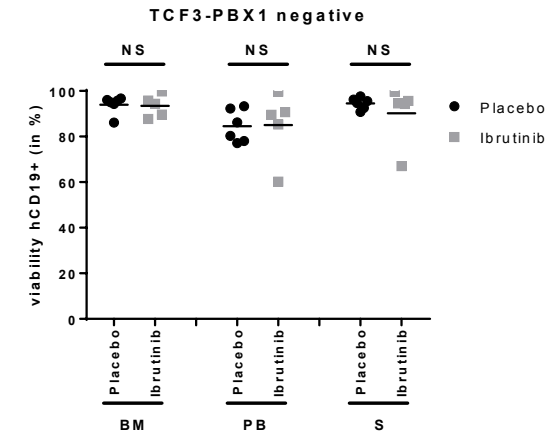

## C

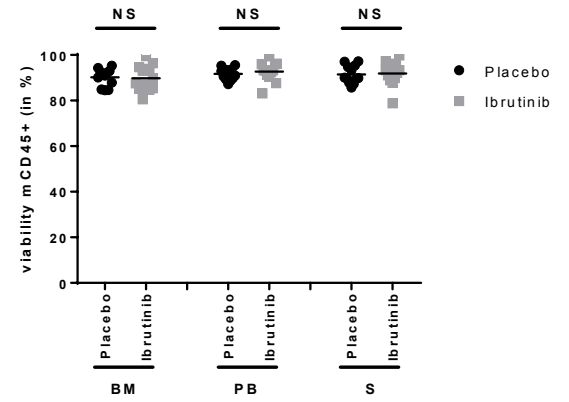

Supplement: mmc1.pdf [file mmc1.pdf]
